# Supplementary material for: Homo-oligomer models prediction, functional characterization, and Ab initio docking analysis of hypothetical protein HP33 from Vibrio harveyi strain
Source: Research Square preprint supplement (doi:10.21203/rs.3.rs-1488433/v1), 2022-04-07
Supplement: Supplementary file 1 [file dab052a0c7b5c642e28b99f8.docx]

| **node1** | **node2** | **node1 annotation** | **node2 annotation** | **score** |
| --- | --- | --- | --- | --- |
| **BAOA01000003_gene3725** | **BAOA01000003_gene3726** | ***annotation not available*** | ***annotation not available*** | **0.516** |
| **BAOA01000003_gene3725** | **BAOA01000049_gene1318** | ***annotation not available*** | ***annotation not available*** | **0.690** |
| **BAOA01000003_gene3725** | **BAOA01000049_gene1319** | ***annotation not available*** | ***annotation not available*** | **0.750** |
| **BAOA01000003_gene3725** | **BAOA01000049_gene1322** | ***annotation not available*** | ***annotation not available*** | **0.691** |
| **BAOA01000003_gene3725** | **BAOA01000049_gene1323** | ***annotation not available*** | ***annotation not available*** | **0.762** |
| **BAOA01000003_gene3725** | **BAOA01000074_gene3453** | ***annotation not available*** | ***annotation not available*** | **0.637** |
| **BAOA01000003_gene3725** | **BAOA01000092_gene3527** | ***annotation not available*** | ***annotation not available*** | **0.689** |
| **BAOA01000003_gene3725** | **BAOA01000092_gene3529** | ***annotation not available*** | ***annotation not available*** | **0.704** |
| **BAOA01000003_gene3725** | **BAOA01000105_gene4706** | ***annotation not available*** | ***annotation not available*** | **0.757** |
| **BAOA01000003_gene3725** | **BAOA01000126_gene1148** | ***annotation not available*** | ***annotation not available*** | **0.784** |
| **BAOA01000003_gene3725** | **BAOA01000157_gene4749** | ***annotation not available*** | ***annotation not available*** | **0.724** |
| **BAOA01000003_gene3726** | **BAOA01000003_gene3725** | ***annotation not available*** | ***annotation not available*** | **0.516** |
| **BAOA01000049_gene1318** | **BAOA01000003_gene3725** | ***annotation not available*** | ***annotation not available*** | **0.690** |
| **BAOA01000049_gene1318** | **BAOA01000049_gene1319** | ***annotation not available*** | ***annotation not available*** | **0.909** |
| **BAOA01000049_gene1318** | **BAOA01000049_gene1323** | ***annotation not available*** | ***annotation not available*** | **0.826** |
| **BAOA01000049_gene1318** | **BAOA01000092_gene3527** | ***annotation not available*** | ***annotation not available*** | **0.448** |
| **BAOA01000049_gene1318** | **BAOA01000092_gene3529** | ***annotation not available*** | ***annotation not available*** | **0.457** |
| **BAOA01000049_gene1318** | **BAOA01000105_gene4706** | ***annotation not available*** | ***annotation not available*** | **0.443** |
| **BAOA01000049_gene1318** | **BAOA01000126_gene1148** | ***annotation not available*** | ***annotation not available*** | **0.706** |
| **BAOA01000049_gene1318** | **BAOA01000157_gene4749** | ***annotation not available*** | ***annotation not available*** | **0.485** |

**Supplementary Table 1**: String Server result of Protein-protein interaction of HP33 protein
